# Supplementary material for: Oral Administration of a Phage Cocktail to Reduce Salmonella Colonization in Broiler Gastrointestinal Tract—A Pilot Study
Source: MDPI journal article supplement (doi:10.3390/ani12223087), 2022-11-09
Supplement: s1 [file s1]

**Table S1.** Serovars of *Salmonella* used for host-range determination

| Serovars       | Codename     | Source of origin <sup>1</sup> | Antigenic determinants |                                 |                        |
|----------------|--------------|-------------------------------|------------------------|---------------------------------|------------------------|
|                |              |                               | O antigen              | H phase I                       | H phase II             |
| Agona          | H3D6         | CBF                           | 1,4,12                 | f,g,s                           | [1,2]                  |
| Albany         | H32          | CBF                           | 8,20                   | Z <sub>4</sub> ,Z <sub>23</sub> | -                      |
| Corvallis      | F3-W5-S2     | CBF                           | 8,20                   | Z <sub>4</sub> ,Z <sub>23</sub> | [Z <sub>6</sub> ]      |
| Kentucky       | S1H28        | CBF                           | 8,20                   | i                               | Z <sub>6</sub>         |
| Mbandaka       | H17D2        | CBF                           | 6,7,14                 | Z <sub>10</sub>                 | e,n,Z <sub>15</sub>    |
| Saintpaul      | H13          | CBF                           | 1,4,[5],12             | e,h                             | 1,2                    |
| Schwarzengrund | H2           | CBF                           | 1,4,12,27              | d                               | 1,7                    |
| Typhimurium    | S5-370       | Human (US)                    | 1,4,[5],12             | i                               | 1,2                    |
| Anatum         | A4-525       | Bovine (US)                   | 3,10[15][15,34]        | e,h                             | 1,6                    |
| Braenderup     | S5-373       | Human (US)                    | 6,7,14                 | e,h                             | e,n,Z <sub>15</sub>    |
| Cerro          | R8-242       | Laboratory strain             | 6,14,18                | Z <sub>4</sub> ,Z <sub>23</sub> | [1,5]                  |
| Dublin         | W1-016       | Dairy farm (TH)               | 1,9,12[Vi]             | g,p                             | -                      |
| Enteritidis    | S5-371       | Human (US)                    | 1,9,12                 | g,m                             | -                      |
| Give           | H2-018       | Dairy farm (TH)               | 3,10[15][15,34]        | [d],l,v                         | 1,7                    |
| Hadar          | PPI-013      | Laboratory strain             | 6,8                    | Z <sub>10</sub>                 | e,n,x                  |
| Heidelberg     | S5-455       | Human (US)                    | 1,4,[5],12             | r                               | 1,2                    |
| Infantis       | S5-372       | Laboratory strain             | 6,7,14                 | r                               | 1,5                    |
| Javiana        | S5-406       | Human (US)                    | 1,9,12                 | l,Z <sub>28</sub>               | 1,5                    |
| Kedougou       | H2-061       | Pig slaughterhouse (TH)       | 1,13,23                | i                               | l,w                    |
| Montevideo     | S5-403       | Bovine (US)                   | 6,7,14                 | g,m,[p],s                       | [1,2,7]                |
| Muenster       | S5-917       | Bovine (US)                   | 3,10[15][15,34]        | e,h                             | 1,5                    |
| Newport        | S5-515       | Laboratory strain             | 6,8,20                 | e,h                             | 1,2:[Z <sub>67</sub> ] |
| Oranienburg    | R8-376       | Human (US)                    | 6,7,14                 | m,t                             | [Z <sub>57</sub> ]     |
| Panama         | S5-454       | Human (US)                    | 1,9,12                 | l,v                             | 1,5                    |
| Paratyphi B    | H2-076       | Laboratory strain             | 1,4,[5],12             | b                               | 1,2                    |
| Rissen         | H2-015       | Pig slaughterhouse (TH)       | 6,7,14                 | f,g                             | -                      |
| Singapore      | PSU-BS-174SL | Food processing plant         | 6,7                    | k                               | e,n,x                  |
| Stanley        | S5-464       | Human (US)                    | 1,4,[5],12,27          | d                               | 1,2                    |

**Table S1.** Serovars of *Salmonella* used for host-range determination (continue)

| Serovars       | Codename     | Source of origin      | Antigenic determinants |                                 |                        |
|----------------|--------------|-----------------------|------------------------|---------------------------------|------------------------|
|                |              |                       | O antigen              | H phase I                       | H phase II             |
| Aberdeen       | DMST15678    | Standard DMST         | 11                     | i                               | 1,2                    |
| Abony          | DMST21863    | Standard DMST         | 1,4,[5],12,27          | b                               | e,n,x                  |
| Alachua        | DMST10896    | Standard DMST         | 35                     | Z <sub>4</sub> ,Z <sub>23</sub> | -                      |
| Amsterdam      | DMST24706    | Standard DMST         | 3,10[15][15,34]        | g,m,s                           | -                      |
| Bangkok        | DMST7121     | Standard DMST         | 38                     | Z <sub>4</sub> ,Z <sub>24</sub> | -                      |
| Bergen         | DMST10895    | Standard DMST         | 47                     | i                               | e,n,Z <sub>15</sub>    |
| Blockley       | DMST16821    | Standard DMST         | 6,8                    | k                               | 1,5                    |
| Choleraesuis   | DMST8014     | Standard DMST         | 6,7                    | c                               | 1,5                    |
| Derby          | DMST8353     | Standard DMST         | 1,4,[5],12             | f,g                             | [1,2]                  |
| Gallinarum     | DMST15968    | Standard DMST         | 1,9,12                 |                                 | -                      |
| Havana         | DMST7116     | Standard DMST         | 1,13,23                | f,g,[s]                         | -                      |
| Hvittingfoss   | DMST15681    | Standard DMST         | 16                     | b                               | e,n,x                  |
| Krefeld        | PSU-BS-111SL | Food processing plant | 1,3,19                 | y                               | l,w                    |
| London         | DMST7110     | Standard DMST         | 3,10[15]               | l,v                             | 1,6                    |
| Ondersterpoort | DMST15680    | Standard DMST         | 1,6,14,[25]            | e,h                             | 1,5                    |
| Ordenez        | PSU-BS-181SL | Food processing plant | 1,13,23                | y                               | l,w                    |
| Paratyphi A    | DMST8486     | Standard DMST         | 1,2,12                 | a                               | [1,5]                  |
| Poona          | DMST15679    | Standard DMST         | 1,13,22                | z                               | 1,6                    |
| Senftenberg    | DMST17013    | Standard DMST         | 1,3,19                 | g,[s],t                         | -                      |
| Tennessee      | PSU-BS-183SL | Food processing plant | 6,7,14                 | Z <sub>29</sub>                 | [1,2,7]                |
| Typhi          | DMST22842    | Standard DMST         | 9,12[Vi]               | d                               | -                      |
| Urbana         | DMST10891    | Standard DMST         | 30                     | b                               | e,n,x                  |
| Virginia       | DMST17373    | Standard DMST         | 8                      | d                               | 1,2                    |
| Waycross       | DMST19205    | Standard DMST         | 41                     | z <sub>4</sub> ,z <sub>23</sub> | [e,n,Z <sub>15</sub> ] |
| Virchow        | H2-117       | Human (US)            | 6,7                    | r                               | 1,2                    |
| Wandsworth     | H2-068       | Laboratory strain     | 39                     | b                               | 1,2                    |
| Weltevreden    | R8-798       | Human (US)            | 3,10[15]               | r                               | Z <sub>6</sub>         |
| 4,5,12: i: -   | S5-390       | Laboratory strain     | 4,5,12                 | i                               | -                      |

<sup>1</sup> CBF: commercial broiler farm; Standard DMST: standard strains received from the Department of Medical Sciences, Ministry of Public Health, Thailand. Strains were also received from different sources from the United States (US) or Thailand (TH).
